# Supplementary material for: A Novel Brief Therapy for Patients Who Attempt Suicide: A 24-months Follow-Up Randomized Controlled Study of the Attempted Suicide Short Intervention Program (ASSIP)
Source: PubMed Central journal article supplement (PMC4773217; doi:10.1371/journal.pmed.1001968), 2016-03-01
Supplement: pmed.1001968.s003.pdf [file pmed.1001968.s003.pdf]

## Checklist of Items for Reporting Trials of Nonpharmacologic Treatments\*

| Section                            | Item | Standard CONSORT Description                                                                                                                                                              | Extension for Nonpharmacologic Trials                                                                                                                                       | Section, paragraph                        |
|------------------------------------|------|-------------------------------------------------------------------------------------------------------------------------------------------------------------------------------------------|-----------------------------------------------------------------------------------------------------------------------------------------------------------------------------|-------------------------------------------|
| <b>Title and abstract†</b>         | 1    | How participants were allocated to interventions (e.g., “random allocation,” “randomized,” or “randomly assigned”)                                                                        | In the abstract, description of the experimental treatment, comparator, care providers, centers, and blinding status                                                        | Title, Abstract                           |
| <b>Introduction</b>                |      |                                                                                                                                                                                           |                                                                                                                                                                             |                                           |
| Background                         | 2    | Scientific background and explanation of rationale                                                                                                                                        |                                                                                                                                                                             | Introduction, 1-4                         |
| <b>Methods</b>                     |      |                                                                                                                                                                                           |                                                                                                                                                                             |                                           |
| Participants†                      | 3    | Eligibility criteria for participants and the settings and locations where the data were collected                                                                                        | When applicable, eligibility criteria for centers and those performing the interventions                                                                                    | Methods, Design, participants             |
| Interventions†                     | 4    | Precise details of the interventions intended for each group and how and when they were actually administered                                                                             | Precise details of both the experimental treatment and comparator                                                                                                           | Methods, Treatment conditions             |
|                                    | 4A   |                                                                                                                                                                                           | Description of the different components of the interventions and, when applicable, descriptions of the procedure for tailoring the interventions to individual participants | Methods, ASSIP                            |
|                                    | 4B   |                                                                                                                                                                                           | Details of how the interventions were standardized                                                                                                                          | Methods, ASSIP                            |
| Objectives                         | 5    | Specific objectives and hypotheses                                                                                                                                                        |                                                                                                                                                                             | Introduction, 4                           |
| Outcomes                           | 6    | Clearly defined primary and secondary outcome measures and, when applicable, any methods used to enhance the quality of measurements (e.g., multiple observations, training of assessors) |                                                                                                                                                                             | Introduction, 4                           |
| Sample size†                       | 7    | How sample size was determined and, when applicable, explanation of any interim analyses and stopping rules                                                                               | When applicable, details of whether and how the clustering by care providers or centers was addressed                                                                       | Methods, 3 Power Analysis and Sample Size |
| Randomization–sequence generation† | 8    | Method used to generate the random allocation sequence, including details of any restriction (e.g., blocking, stratification)                                                             | When applicable, how care providers were allocated to each trial group                                                                                                      | Methods, Design                           |

|                                 |          |                                                                                                                                                                                                                                                                                                                                       |                                                                                                                                                              |                                |
|---------------------------------|----------|---------------------------------------------------------------------------------------------------------------------------------------------------------------------------------------------------------------------------------------------------------------------------------------------------------------------------------------|--------------------------------------------------------------------------------------------------------------------------------------------------------------|--------------------------------|
| Allocation concealment          | 9        | Method used to implement the random allocation sequence (e.g., numbered containers or central telephone), clarifying whether the sequence was concealed until interventions were assigned                                                                                                                                             |                                                                                                                                                              | Methods, Design                |
| Implementation                  | 10       | Who generated the allocation sequence, who enrolled participants, and who assigned participants to their groups                                                                                                                                                                                                                       |                                                                                                                                                              | Methods, Design                |
| Blinding (masking)†             | 11A      | Whether or not participants, those administering the interventions, and those assessing the outcomes were blinded to group assignment                                                                                                                                                                                                 | Whether or not those administering co-interventions were blinded to group assignment                                                                         | n/a                            |
|                                 | 11B      |                                                                                                                                                                                                                                                                                                                                       | If blinded, method of blinding and description of the similarity of interventions†                                                                           |                                |
| Statistical methods†            | 12       | Statistical methods used to compare groups for primary outcome(s); methods for additional analyses, such as subgroup analyses and adjusted analyses                                                                                                                                                                                   | When applicable, details of whether and how the clustering by care providers or centers was addressed                                                        | Methods, Statistical Analysis  |
| <b>Results</b>                  |          |                                                                                                                                                                                                                                                                                                                                       |                                                                                                                                                              |                                |
| Participant flow†               | 13       | Flow of participants through each stage (a diagram is strongly recommended)---specifically, for each group, report the numbers of participants randomly assigned, receiving intended treatment, completing the study protocol, and analyzed for the primary outcome; describe deviations from study as planned, together with reasons | The number of care providers or centers performing the intervention in each group and the number of patients treated by each care provider or in each center | Results, Figure 1              |
| Implementation of intervention† | New item |                                                                                                                                                                                                                                                                                                                                       | Details of the experimental treatment and comparator as they were implemented                                                                                | Methods, Treatment conditions  |
| Recruitment                     | 14       | Dates defining the periods of recruitment and follow-up                                                                                                                                                                                                                                                                               |                                                                                                                                                              | Results, Enrollment statistics |
| Baseline data†                  | 15       | Baseline demographic and clinical characteristics of each group                                                                                                                                                                                                                                                                       | When applicable, a description of care providers (case volume, qualification, expertise, etc.) and centers (volume) in each group                            | Results, Table 1               |

|                         |    |                                                                                                                                                                                                           |                                                                                                                                                                       |                                                               |
|-------------------------|----|-----------------------------------------------------------------------------------------------------------------------------------------------------------------------------------------------------------|-----------------------------------------------------------------------------------------------------------------------------------------------------------------------|---------------------------------------------------------------|
| Numbers analyzed        | 16 | Number of participants (denominator) in each group included in each analysis and whether analysis was by “intention-to-treat”; state the results in absolute numbers when feasible (e.g., 10/20, not 50%) | â                                                                                                                                                                     | Fig. 1<br>Table 2                                             |
| Outcomes and estimation | 17 | For each primary and secondary outcome, a summary of results for each group and the estimated effect size and its precision (e.g., 95% confidence interval)                                               |                                                                                                                                                                       | Results, Primary Outcome Measures, Secondary Outcome Measures |
| Ancillary analyses      | 18 | Address multiplicity by reporting any other analyses performed, including subgroup analyses and adjusted analyses, indicating those prespecified and those exploratory                                    |                                                                                                                                                                       | Results, Repeated Suicide Attempts                            |
| Adverse events          | 19 | All important adverse events or side effects in each intervention group                                                                                                                                   |                                                                                                                                                                       | Results, Attrition Rates and Missing Data                     |
| <b>Discussion</b>       |    |                                                                                                                                                                                                           |                                                                                                                                                                       |                                                               |
| Interpretation†         | 20 | Interpretation of the results, taking into account study hypotheses, sources of potential bias or imprecision, and the dangers associated with multiplicity of analyses and outcomes                      | In addition, take into account the choice of the comparator, lack of or partial blinding, and unequal expertise of care providers or centers in each group            | Discussion, 1,2,3                                             |
| Generalizability†       | 21 | Generalizability (external validity) of the trial findings                                                                                                                                                | Generalizability (external validity) of the trial findings according to the intervention, comparators, patients, and care providers and centers involved in the trial | Conclusions                                                   |
| Overall evidence        | 22 | General interpretation of the results in the context of current evidence                                                                                                                                  |                                                                                                                                                                       | Discussion, Comparison with other studies and implications    |

\*Additions or modifications to the CONSORT checklist. CONSORT = Consolidated Standards of Reporting Trials.

†This item was modified in the 2007 revised version of the CONSORT checklist.
